1  
2  
3  
4  
5  
6  
7  
8  
9  
10  
11  
12  
13  
14  
15  
16  
17  
18  
19

**Middle-schoolers’ reading and processing depth in response to digital and print media:**

**An N400 study**

Karen Froud<sup>a¶\*</sup>, Lisa Levinson<sup>a¶</sup>, Chaille Maddox<sup>a¶</sup>, Paul Smith<sup>a¶</sup>

<sup>a</sup> Neurocognition of Language Lab, Department of Biobehavioral Sciences, Teachers College,  
Columbia University, New York, New York, United States

\* Corresponding Author  
Email: [kf2119@tc.columbia.edu](mailto:kf2119@tc.columbia.edu)

¶ These authors contributed equally to this work.

## 20 **Abstract**

21 We report the first use of ERP measures to identify text engagement differences when  
22 reading digitally or in print. Depth of semantic encoding is key for reading comprehension, and  
23 we predicted that deeper reading of expository texts would facilitate stronger associations with  
24 subsequently-presented related words, resulting in enhanced N400 responses to unrelated probe  
25 words and a graded attenuation of the N400 to related and moderately related words. In contrast,  
26 shallow reading would produce weaker associations between probe words and text passages,  
27 resulting in enhanced N400 responses to both moderately related and unrelated words, and an  
28 attenuated response to related words. Behavioral research has shown deeper semantic encoding  
29 of text from paper than from a screen. Hence, we predicted that the N400 would index deeper  
30 reading of text passages that were presented in print, and shallower reading of texts presented  
31 digitally.

32 Middle-school students ( $n = 59$ ) read passages in digital and print formats and high-density  
33 EEG was recorded while participants completed single-word semantic judgment tasks after each  
34 passage. Following digital text reading, the N400 response pattern anticipated for shallow  
35 reading was observed. Following print reading, the N400 response pattern expected for deeper  
36 reading was observed for related and unrelated words, although mean amplitude differences  
37 between related and moderately related probe words did not reach significance. These findings  
38 provide evidence of differences in brain responses to texts presented in print and digital media,  
39 including deeper semantic encoding for print than digital texts.

40

## 41 **Introduction**

42           The use of digital platforms for delivery of instruction and information at school and at  
43 home is now requisite for students at all levels, from elementary school through higher  
44 education. The increased use of digital materials alongside paper-based materials in learning  
45 environments has motivated research into the efficacy of reading and learning in one format  
46 versus the other (e.g., [1-5]), and although there is an overall finding for a paper-based  
47 advantage, the outcomes have been nuanced. Some reports have indicated no differences  
48 between print and digital media with respect to reading ability [1, 6-13], or reading rates and eye  
49 movements as measured by eye-tracking [14]. Some authors reported faster reading times in  
50 digital compared to paper environments [15, 16], while others reported the reverse [17-20].  
51 Notably, those reporting shorter reading times for computer-based reading also reported a  
52 decrease in reading comprehension accuracy in this medium. However, Kim and Kim [20] found  
53 that teenagers read faster in the paper-based condition compared to a digital format with a  
54 scrolling feature, and also that they scored significantly higher on exams when they studied via  
55 paper-based texts. Others [1, 8, 21] reported no difference in reading times between the two  
56 media but observed higher comprehension scores in the paper-based condition, suggesting a  
57 metacognitive moderating factor. This proposition is supported by results showing that outcomes  
58 are poorer on computer-based exams when time is constrained, in contrast to self-paced exams,  
59 perhaps because students find it more difficult to self-regulate, monitor task progress, and  
60 manage goals and time in digital space [4, 22, 23]. Lauterman and Ackerman [24] also found that  
61 the media preferences of exam-takers correlated with performance, suggesting that findings for a  
62 computer-based inferiority may be associated with a deficit in the knowledge and skills  
63 necessary to navigate in the digital medium.

64           Reading comprehension seems also to be moderated by both depth of remembering and  
65 text genre. Comprehension scores measured by understanding the gist of what was read have  
66 been repeatedly shown not to differ between narrative and expository texts, regardless of the  
67 medium of text presentation [1, 2, 6, 12]. In contrast, reading both expository and complex texts  
68 from paper seems to be consistently associated with deeper comprehension and learning [1, 2,  
69 25]. Mangen et al. [26] observed an advantage for print over digital media for both narrative and  
70 expository texts.

71           These varied outcomes may be attributed to a number of factors, such as differences in  
72 age and grade-level of study participants, their learning goals, and learned strategies. For  
73 elementary students, medium of presentation has been shown to have little influence on  
74 comprehension of simple texts [6, 7]. Lenhard et al. [15] found that elementary and middle  
75 school children were faster at completing a reading comprehension assessment on computer  
76 compared to paper under time constraints, but at the expense of accuracy. Critical reading skills  
77 of high school and college students were compared by Eshet-Alkalai and Geri [27], who found  
78 that younger students performed better when reading news in digital formats compared to paper,  
79 while college students performed better on the same task when reading in paper formats.

80           Against this lack of clarity in the behavioral findings, there has been little brain imaging  
81 work to further elucidate the mechanisms that underpin reading in print versus digital formats.  
82 Kretzschmar et al. [14] recorded electroencephalography (EEG) during their eye-tracking  
83 paradigm, that was designed to evaluate whether stated preferences for the printed medium  
84 (versus one of two digital devices) correlated with indices of text engagement in young and older  
85 adults. Comprehension accuracy did not differ with text presentation medium for either group,  
86 but the older adults showed shorter mean fixation durations and lower EEG theta band voltage

87 density when reading from a tablet computer in comparison to an e-reader or a printed page.  
88 Younger adults did not show any such differences, and Kretzschmar et al. interpret the observed  
89 differences as relating to limitations on memory encoding and retrieval for the older adults,  
90 affected by reduced contrast sensitivity, that could be somewhat ameliorated by the backlit  
91 display of the tablet computer. However, there exist currently no other reports of EEG measures  
92 applied to the question of reading in different media, and crucially there have been no  
93 investigations of brain responses to print vs. digital text processing in children.

94         For our investigation, we drew upon depth of processing theory, first posited by Craik  
95 and Lockhart [28]. The premise of this theoretical framework is that shallow information  
96 processing yields less durable episodic memory traces, while deeper processing results in more  
97 durable traces. The central claim is that the more deeply information is processed, the more  
98 durable the associated memory traces. Kintsch [29, 30] has described text comprehension as a  
99 dynamic process of constructing meaning from semantic relations among words in the text and  
100 stored knowledge about subject matter. According to seminal work by Craik and Tulving [31],  
101 processing of verbal text information requires the use of semantic processes (protocols  
102 concerning the ways in which words work together to create meaning); hence, text processing  
103 strategies for reading may involve drawing on contextual, semantic, grammatical, and phonemic  
104 knowledge in systematic ways to work out what information is conveyed by a text. Such  
105 strategies would allow an encoded unit to be integrated with knowledge of the world or  
106 “semantic memory” (e.g., [32]). At retrieval, informational cues would then tap into this  
107 semantic memory structure to reconstruct an initial encoding [31].

108         Based on this theoretical framework, we proposed that *the medium* whereby readers  
109 engage with text/reading material would be a crucial determinant of differences in depth of

110 processing, and consequently the durability of the semantic memory structure that is established.  
111 Congruous encoding between a semantic structure already established by a reader and a semantic  
112 structure associated with a newly encoded unit should facilitate efficient comprehension of a  
113 text, first because a meaning-referenced elaborated trace network is formed, and second because  
114 robust congruent semantic encoding also entails alignment with the structure, rules, and  
115 organization of semantic memory [31, 33].

116 Consistent with this view of semantic structure and encoding processes, we hypothesized  
117 that depth of semantic encoding is key for reading comprehension and for congruency between  
118 existing semantic structures and the semantic structures encoded by probe words. Based on  
119 previous research, semantic encoding of text presented on paper is deeper than that of text  
120 presented digitally [1, 26]. Therefore, our experimental approach to measuring reading  
121 comprehension in the brain made use of a signature of electrophysiological activation associated  
122 with semantics in language processing: the N400 event-related potential (e.g., [34, 35]).

123 The N400 event-related potential (ERP) indexes brain response differences between  
124 expected and unexpected stimuli. Since we hypothesized that the encoding of word meaning  
125 during the reading experience is critical for comprehension, then we should be able to index  
126 shallow vs. deep information processing of text delivered in print or digitally by observing  
127 differences in N400 responses to probe words that were selected to be related, moderately  
128 related, or unrelated in meaning to written passages. Based on this hypothesis and given that both  
129 the culturally prevailing view and data meta-analytic studies [1-5] suggest that reading digitally  
130 presented text promotes shallower engagement than print, our predictions for the  
131 electrophysiological index were as follows: 1) In the digital reading condition, the N400  
132 amplitude response to related word probes was predicted to be attenuated compared to

133 moderately related and unrelated word probes, with amplitude differences between moderately  
134 related and unrelated word conditions expected to be equivalent; and 2) In the print reading  
135 condition, the N400 amplitude response to the three conditions is predicted to be graduated.  
136 Specifically, the amplitude measures were predicted to increase in their negativity such that the  
137 response to the related words would be most attenuated, followed by the moderately related  
138 words, with words that are unrelated to the text passage eliciting the greatest negativity.  
139 Differences in the N400 ERP response between the two mediums for the moderately related  
140 word conditions may offer essential insights about the neurocognitive processing underlying  
141 reading comprehension, and whether readers in some situations process text somewhat more  
142 shallowly under conditions of digital text presentation than when processing text via print  
143 presentation.

144

## 145 **Materials and methods**

### 146 **Participants**

147 We collected data from 65 participants from the New York City metropolitan area and  
148 were able to retain data from 59 (five were removed due to unusable behavioral data; one was  
149 removed due to low numbers of EEG trials per condition following artifact detection – detailed  
150 further below).

151 The mean age of retained participants was 10.88 years ( $SD = 0.77$ ); of these, 28 identified  
152 as male and 28 as female, with one participant giving no response to this question. Most  
153 participants were in 5th ( $n = 21$ ) or 6th grade ( $n = 22$ ) at the time of their lab session, as  
154 expected; the remainder were in 4<sup>th</sup> ( $n = 2$ ), 7<sup>th</sup> ( $n = 10$ ), or 8th grade ( $n = 2$ ), and two indicated  
155 “other”. All participants were from households with at least one parent or guardian who attended

156 some post-secondary education, with the majority having earned degrees: associate degree  
157 (3.5%), bachelor's or undergraduate degree (28.1%), master's degree (52.6%), or doctorate  
158 (10.5%). Household annual income was reported as \$150,000 per year or above for 56% of  
159 participants, with the balance of participants spread among the other income brackets (no  
160 response; \$35,000 – \$49,999; \$50,000 – \$74,000; \$75,000 – \$99,999; \$100,000 – \$149,999).

## 161 **Stimuli**

### 162 **Passages**

163         Based on the key finding that a paper-based reading advantage is seen largely in studies  
164 using informational or a mix of informational and narrative text [1, 2, 25], all reading passages  
165 were developed as informational texts. Several additional goals were set for the passage  
166 development so that passages could be used as controlled experimental stimuli yet remain similar  
167 to text that might be found in a classroom setting. The passages covered a range of topics to  
168 account for differing interests among participants. We also controlled the level of reading  
169 difficulty and complexity while maintaining grade-level and age-appropriate standards. Finally,  
170 we ensured that there was sufficient content for generation of word probe stimuli for the  
171 subsequent single-word semantic relatedness judgement task. These passages were limited to  
172 relatively simple sentence structures (minimizing relative or subordinate clauses) while  
173 preserving the historical and scientific accuracy of the presented material.

174         Eight passages were created in thematic pairs to allow for later comparison across mediums.  
175 The passages were matched for length with respect to average number of words per sentence  
176 (*mean* = 11.736, *SD* = 1.073), number of total words (*mean* = 189.125, *SD* = 9.250), and number  
177 of sentences (*mean* = 16.250, *SD* = 1.389). Readability scores were calculated and matched for  
178 each passage, specifically the Flesch-Kincaid Grade Level ([36]: *mean* = 5.775, *SD* = 0.711),



179 Gunning Fog score ([37]:  $mean = 7.950$ ,  $SD = 0.795$ ), and the SMOG index ([38]:  $mean = 6.388$ ,  
180  $SD = 0.541$ ). In addition, we matched the passages on Propositional Count (PC), a quantification  
181 of the number of semantic units and their connections within the text ([39-41]:  $mean = 65.750$ ,  
182  $SD = 2.188$ ).

### 183 **Passage Reading Comprehension Measure**

184 To assess participant comprehension for each text, it was necessary to develop passage-  
185 specific assessments. The Sentence Verification Technique (SVT; [42]) is an assessment  
186 procedure based on the theoretical assumption that reading comprehension is a constructive  
187 process involving interactions between incoming discourse and the reader's prior knowledge  
188 structure. SVT comprehension test items are graded questions derived from texts that require  
189 varying levels of passage knowledge to answer. The four question types specified within the  
190 framework are: *Explicit/Original*, whereby a sentence directly from the text must be identified as  
191 such by the reader; *Paraphrase*, whereby a sentence from the text is paraphrased, and must be  
192 identified as such; *Meaning Change*, a sentence that changes an aspect of meaning presented in  
193 the text, and which should therefore be rejected by the reader; and *Unrelated/Distractor* items.  
194 We used *Explicit* and *Unrelated* categories from the SVT framework as defined but made  
195 adaptations to the other two question types. For the *Meaning Change* condition, we altered  
196 sentence meanings by replacing only a single propositional predicate with a related probe word.  
197 Our *Paraphrase* items were not sentences from the passage themselves, but true statements that  
198 combined propositions from across the entire text. SVT sentences were constructed to minimize  
199 syntactic complexity (active sentences only, no subordinate clauses), matched for sentence length  
200 (mean 10.625 words per sentence,  $SD = 1.619$ ), and controlled with respect to the age of  
201 acquisition (AoA) of individual words (based on ratings from [43]; mean AoA for all SVT items

202 = 5.984,  $SD = 1.936$ ).

203 Conventionally, SVT items elicit a binary response (*Yes, No*) making scoring a simple  
204 process. For our purposes, we provided students with three selection options based on the  
205 relatedness of the sentence to the passage: (1) *I read exactly this sentence in the passage*; (2) *The*  
206 *facts in this sentence were in the passage*; or (3) *None of the facts in this sentence were in the*  
207 *passage*. We applied a binary scoring procedure to *Explicit* and *Distractor* responses to SVT  
208 items: an *Explicit* item was scored correct if response (1) was selected, and a *Distractor* item was  
209 scored correct if response (3) was selected. In the conventional SVT framework, *Meaning*  
210 *Change* test items should all be identified as false, whereas our items were a mixture of true and  
211 false statements. Per convention all *Paraphrase* items were true. For analyses, we marked a  
212 *Paraphrase* item as correct if a respondent indicated response (2); we scored the *Meaning*  
213 *Change* items as correct if either (2) or (3) was chosen, depending on the assigned truth value for  
214 that statement.

## 215 **Validation of Passages and Passage Comprehension Items**

216 Prior to conducting the experiment, we collected online reader response data to the eight  
217 passages via Panelbase LLC (panelbase.net). These data ensured that stimuli were balanced with  
218 respect to the following parameters: reading time for each passage; participant interest in the  
219 passages; self-reports of reading difficulty; a set of cloze questions to evaluate attention to each  
220 passage; and the constructed SVT items. Respondents represented a random sample of students  
221 matching the study target population, drawn from U.S. urban areas excluding New York City.  
222 Between 70 and 80 participants completed a survey that included a selection of two of the eight  
223 passages. The results of this pre-study validation procedure pointed to general equivalency  
224 across these eight passages in terms of difficulty and accessibility, as well as general responses to

225 the SVT question types. Analyses of this data identified that one passage set (two thematically  
226 related passages) was more difficult relative to the others, and so these two passages were  
227 excluded from the experiment.

## 228 **Stimulus Probe Words**

229 Probe words for the semantic relatedness judgment paradigm were generated by  
230 identifying verbs or nouns at the center of propositions in each passage as targets for semantic  
231 field interrogation. Using the WordNet 3.0 database [44-46], each selected verb and noun was  
232 used as a search term and the relevant propositional sense was identified in the returned synset  
233 listings. Each synset was then expanded and lexical items (uninflected, nonderived) of the same  
234 word class as the target proposition were selected from synset lists. Frequency (Zipf scores:  
235 [47]), age of acquisition (AOA: [43]) and length characteristics (NLET, NPHON, and NSYLL,  
236 all from the MRC Psycholinguistics Database: [48]) were determined for each item. Items were  
237 included in the semantic rating experiment only when their frequency and AOA ratings were  
238 within 1 SD of the mean for the target passage. Concreteness was also evaluated, and there were  
239 no differences between any of the word conditions with respect to that property [49]. Probe  
240 words fell into three categories: *Related*, *Moderately Related*, and *Unrelated*.

241 Potential items for the *Related* category of word probes were identified based on the  
242 specific propositions identified in each passage. Based on the number of related words that were  
243 identified per passage, a number of words from a pool of semantically unrelated words that were  
244 likewise matched on AOA and frequency were also included, to yield up to 100 target items per  
245 passage. Relatedness ratings were validated using the online platform Prolific (prolific.co).  
246 Semantic ratings were solicited from an adult population as opposed to the target population of  
247 middle-school students given that adults are more likely to have well-developed semantic

248 networks [50]. Adult raters read each text passage and then rated candidate probe words for  
249 relatedness to the passage on a scale from 0% to 100%. Each participant rated potential probe  
250 words for two passages. For each passage, the candidate probe words were rated on relatedness  
251 by 100-150 participants. Ratings were trimmed to remove ratings of 0% or 100% and Gaussian  
252 mixture modeling (e.g., [51, 52]) was applied to data for each passage to cluster ratings into the  
253 three stimulus categories: related, moderately related and unrelated. The 20 words closest to the  
254 mean score within a cluster were assigned to that category; if a category contained fewer than 20  
255 words, only that many words were assigned. Probe words that applied to multiple passages were  
256 assigned to the category and passage for which they were closest to their cluster mean, and the  
257 next closest word was chosen for the other passage.

258         The moderately-related words, those that fell within the center cluster, were labeled as  
259 “chimera” items, reflecting the possibility that a word that is moderately related to some context  
260 could also be identified as moderately unrelated to that context. The judgement task for N400  
261 elicitation required a binary decision concerning relatedness (related vs. unrelated), and these  
262 items were evaluated as somewhere in between. The chimera words were crucial to our  
263 predictions, as we anticipated that deeper processing would facilitate participants’ identification  
264 of chimera words as related to the preceding textual context, while shallower processing would  
265 be more likely to result in identification of chimera words as unrelated.

## 266 **Psychometric Measures**

267         All participants completed a set of standardized assessments, plus an additional assessment  
268 of auditory working memory, as follows:

- 269         • Wechsler Intelligence Scale for Children V [53] Digit Span subtest – an assessment of  
270         working memory capacity

- 271 • Woodcock Reading Mastery III [54] Passage Comprehension subtest – an assessment of  
272 general reading comprehension
- 273 • Woodcock reading Mastery III [54] Word Attack subtest – an assessment of phonemic  
274 decoding ability
- 275 • Swanson Listening Sentence Span Task (LSST; [55]) – an assessment of working  
276 memory span that is mediated by language

## 277 **Data Collection**

278 Data were collected in three phases: Phase 1 for the online administration of  
279 psychometric assessments; Phase 2 for the EEG recordings and the immediate passage recall  
280 comprehension measure; and Phase 3 for the online administration of the passage retention  
281 comprehension measure. All informed consent and experimental procedures were carried out  
282 with approval of the Teachers College, Columbia University Institutional Review Board  
283 (Protocol # 22-173). Written informed consent/assent was obtained from all individual  
284 participants included in the study.

### 285 **Phase 1: Psychometric Assessments**

286 In Phase 1, responses to behavioral assessments were collected by two trained assessment  
287 administrators online during video conference sessions. The parent/guardian received a study  
288 overview, consent, and assent forms in advance of the scheduled appointment. They were asked  
289 to select a quiet setting with the home with minimal distractions where the participant could  
290 complete the assessments. Online, the assessment administrator reviewed the materials and  
291 responded to questions before the parent/guardian and their child completed the consent and  
292 assent forms obtained via a Qualtrics survey. The sessions were approximately 25 to 30 minutes  
293 in length and audio recordings were stored for the purpose of second-scoring of measures.

## 294 **Phase 2: EEG Recording**

295 In Phase 2, participants and their accompanying parent/guardian attended the  
296 Neurocognition of Language Lab at Teachers College, Columbia University. High-density EEG  
297 data were continuously recorded in NetStation 4.3.1, using a 128-channel HydroCel Geodesic  
298 Sensor Net (MagStim Electrical Geodesics, Inc.). Signals were amplified using a NetAmps 200  
299 series amplifier. Samples were collected at a rate of 500 Hz; an online low-pass filter of 200 Hz  
300 and high-pass filter of .1 Hz were applied. Impedances were kept below 40 kilohms and were  
301 re-checked between blocks. Participants completed sessions in an electrically shielded and  
302 sound-attenuated room, seated 65 cm from a computer monitor with a brightness of  $75 \text{ cd/m}^2$ .

303 Each participant was first exposed to texts that were presented via either a paper booklet  
304 (print) or a laptop screen (digital). For the digital reading condition, visual readability variables  
305 (contrast, brightness, text size) between the laptop screen and the stimulus presentation screen  
306 were held equivalent. The order of medium and passage presentation was balanced between  
307 participants. Passage reading time was recorded, and then participants completed two tasks,  
308 presented using E-Prime 3.0 (Psychology Software Tools, LLC).

309 First, participants read one text passage in their assigned medium. Then they completed  
310 the semantic relatedness judgment task in response to single probe words presented on a  
311 computer screen. They responded to each word by pressing one button to indicate that a word  
312 was related to the passage, and another if they thought the word was unrelated (see Fig 1).

313 After the semantic relatedness judgment task, the SVT recall comprehension test items  
314 were displayed, and participants were prompted to respond. This procedure was repeated for two  
315 additional passages in the selected medium (either print or digital). Then, the medium of  
316 presentation was switched, and the process was repeated for another three passages.

317

318 **Fig 1. Timeline for example trials from the semantic relatedness task.**

319

### 320 **Phase 3: Passage Retention Measure**

321 Following the EEG recording session, participants were emailed a link to the follow-up  
322 Qualtrics retention comprehension survey. This consisted of the same SVT recall comprehension  
323 test items that they completed during the EEG portion of the study and was included to provide  
324 an indication of information retention. Participants were asked to complete the measure within  
325 24 hours of their visit to the lab, but survey responses were accepted up to seven days after their  
326 lab visit.

### 327 **EEG Data Analysis**

#### 328 **Pre-Processing**

329 EEG data were pre-processed using the Harvard Automated Processing Pipeline for  
330 Electroencephalography (HAPPE; [56]), specifically the event-related extension (HAPPE+ER;  
331 [57]). The sensitivity of the HAPPE procedures allows for more trials to be kept and averaged  
332 when dealing with high-variance data such as those associated with children. Globally bad  
333 channels were detected and removed from the remainder of the pipeline. Across all participants,  
334 an average of 93.6% (SD: 4.4%) of channels were good, with a range of 61.2% to 99.2%. A hard  
335 wavelet threshold was applied to remove artifacts from the continuous EEG data, a technique  
336 that improves upon previous methods of detecting artifacts to retain more of the EEG signal  
337 instead of rejecting segments at this stage [57]. A pre-established bandpass filter from 0.1-40 Hz  
338 was utilized, and data were segmented from 100 milliseconds (ms) before stimulus presentation  
339 to 750 ms post-presentation.

340 Segmented data were subjected to baseline correction, whereby the average of the EEG  
341 recorded during the baseline period for each epoch was subtracted from the post-stimulus period.  
342 Bad data within each segment were interpolated and segments were rejected based on a joint  
343 probability criterion as well as amplitude cutoffs of -150 and 150 microvolts. Globally bad  
344 channels were replaced based on spherical spline interpolation of data from surrounding  
345 electrodes, and data were re-referenced offline to the average of the left and right mastoid  
346 channels (electrodes 57 and 100).

347 Participants were excluded from further analysis if more than 40% of trials for any  
348 passage were rejected. Of 65 participants, one was excluded due to low numbers of trials in the  
349 final analysis and others due to inability to use behavioral data; analyses were therefore based on  
350 data from 59 participants. For all retained participants, at least 50% of trials were deemed usable;  
351 on average, 66.5% of trials were usable (SD: 5.8%; range: 53.2% to 82.3%). The numbers of  
352 trials per participant did not vary significantly across medium or passage. For the related and  
353 unrelated conditions, error trials (trials in which a participant had misidentified a related word as  
354 unrelated, or vice versa) were also excluded from further analysis. All trials were kept for the  
355 chimera condition, as their intermediate level of relatedness makes them hard to accurately  
356 categorize in a binary fashion. In the print medium, 910 related trials, 2,024 chimera trials, and  
357 1,961 unrelated trials were used in subsequent analyses; in the digital medium, trial numbers  
358 came to 909 related trials, 2,016 chimera trials, and 2,028 unrelated trials.

359 Baseline-corrected epochs for each word condition were then averaged together for each  
360 individual participant, providing individual averages per medium and condition. Individual  
361 event-related potentials were interrogated for mean amplitude of the target component within an  
362 *a priori*-established time window, 300-500 milliseconds post-stimulus. Individual averages per



363 condition were then grand averaged to generate group ERP waveforms.

## 364 **Montaging**

365 N400 montages vary across studies (e.g., [58]). The electrode montage for investigation  
366 of the N400 component was selected based in part on the N400 context and discourse literature  
367 [59-65]. Fig 2 below indicates the montage of interest; all plots of the derived event-related  
368 potentials relate to this montage.

369

370 **Fig 2. Montage for N400 analysis.** Electrodes included in the analysis montage are indicated in  
371 green: electrode numbers 54, 55, 61, 62, 67, 71, 72, 76, 77, 78, 79.

372

373

## 374 **Results**

### 375 **Phase 1: Psychometric Assessments**

376 All participants completed a set of standardized assessments, plus an assessment of  
377 auditory working memory. Table 1 below provides mean scores and standard deviations for each  
378 assessment for all included participants ( $n = 59$ ). We applied a criterion to include only those  
379 participants whose scores on all assessments were within 3 standard deviations of the sample  
380 mean for each assessment. All participants met this criterion. While we did not have any outliers  
381 that needed to be removed from the data analysis, a range of abilities was represented within this  
382 sample of middle school students.

383 **Table 1. Mean scores and standard deviations for psychometric reading assessments.**

---

| Source Assessment Battery | Subtest / Scoring Sample | Mean standard score (SD) |
|---------------------------|--------------------------|--------------------------|
|---------------------------|--------------------------|--------------------------|

---

|                              |                                  |                |
|------------------------------|----------------------------------|----------------|
| WISC-V                       | Digit Span – forwards            | 11.49 (3.28)   |
|                              | Digit Span – backwards           | 10.93 (3.37)   |
| WRMT-III                     | Word Attack – by grade           | 107.20 (11.89) |
|                              | Word Attack – by age             | 107.90 (11.70) |
|                              | Passage Comprehension – by grade | 116.05 (14.44) |
|                              | Passage Comprehension – by age   | 117.81 (14.76) |
| Listening Sentence Span Task | N/A                              | 2.10 (1.34)    |

384

385 We evaluated correlations between these measures to determine which assessments of  
 386 working memory (digit span and LSST) were correlated with the measures of language skill  
 387 from the WRMT-III. A review of the relationships between different measures revealed no  
 388 significant correlations between the Listening Sentence Span Task (LSST) and traditional  
 389 working memory measures (forward and backward digit span:  $r = .088, p = .507$  and  $r = .155, p =$   
 390  $.241$ , respectively). However, there was a significant correlation between the digit span scores ( $r$   
 391  $= .559, p < .001$ ). The LSST measure was found to be positively correlated with both word attack  
 392 and passage comprehension scores (see table 2, below).

393 **Table 2. Correlations between scores on working memory and language assessments.**

| WRMT-III subtest    | LSST          | Digits Forward | Digits Backward |
|---------------------|---------------|----------------|-----------------|
|                     | $r (p)$       | $r (p)$        | $r (p)$         |
| Word Attack – Grade | .354 (.006)** | .510 (<.001)** | .408 (.001)**   |
| Word Attack – Age   | .327 (.011)*  | .517 (<.001)** | .418 (<.001)**  |

|                               |              |              |               |
|-------------------------------|--------------|--------------|---------------|
| Passage Comprehension – Grade | .327 (.011)* | .261 (.046)* | .401 (.002)** |
| Passage Comprehension – Age   | .326 (.012)* | .241 (.065)  | .399 (.002)** |

394 WRMT-III = Woodcock Johnson Reading Mastery Test, 3<sup>rd</sup> edition; LSST = Swanson Listening

395 Sentence Span Task. Correlation coefficients (*r*-statistics) are provided with *p*-values.

396 \* = significant at <.05; \*\* = significant at <.01.

397

398 These findings indicate that (a) working memory was within a typical range across the  
399 group of participants; (b) that working memory is important to control in experimental  
400 approaches to reading comprehension; and (c) that working memory is *not* likely to be a factor  
401 influencing neurophysiological response differences between passages in this experiment.

## 402 **Phase 2: Event-Related Potentials**

403 We examined the grand-averaged N400 responses to all probe word conditions (i.e.,  
404 related, chimera, unrelated) within each medium (i.e., following texts presented in digital vs.  
405 print media). Plots displaying the grand-averaged waveforms of participant responses for each  
406 probe word condition within each presentation medium condition are shown in Fig 3. Within  
407 each medium condition, paired-samples *t*-tests were conducted to observe differences between  
408 the three probe word types. Following text presented in the digital medium, the N400 response to  
409 related words was significantly different from the response to both chimera words (mean  
410 difference = 1.644  $\mu$ V,  $t(58) = 3.562$ ,  $p = .0012$ ,  $d = .464$ ) and unrelated words (mean difference  
411 = 2.204  $\mu$ V,  $t(58) = 4.055$ ,  $p < .003$ ,  $d = .528$ ). The response to chimera words was not  
412 significantly different than the response to unrelated words in the digital text condition (mean  
413 difference = .560  $\mu$ V,  $t(58) = 1.718$ ,  $p = .138$ ,  $d = .224$ ). Following texts presented in the print  
414 medium, the response difference between related and unrelated words was significant (mean

415 difference = 1.043  $\mu\text{V}$ ,  $t(58) = 2.755$ ,  $p = .012$ ,  $d = .359$ ). The difference between related and  
416 chimera words was not significant (mean difference = .304  $\mu\text{V}$ ,  $t(58) = .798$ ,  $p = .642$ ,  $d = .104$ ),  
417 but a significant difference between chimera words and unrelated words was observed (mean  
418 difference = .739  $\mu\text{V}$ ,  $t(58) = 2.546$ ,  $p = .021$ ,  $d = .331$ ). All tests were controlled for multiple  
419 comparisons via Bonferroni correction within medium.

420

421 **Fig 3. Grand-averaged waveforms in response to the semantic relatedness task following**  
422 **digital text presentation.** Includes all retained participants, correct response trials only for  
423 related and unrelated word conditions, and all responses to chimera words (no error criterion for  
424 this condition). Variance around the mean waveforms is shown as shadow. Green: Related  
425 condition; blue: Chimera condition; red: unrelated condition.

426

427 **Fig 4. Grand-averaged waveforms in response to the semantic relatedness task following**  
428 **digital text presentation.** Includes all retained participants, correct response trials only for  
429 related and unrelated word conditions, and all responses to chimera words (no error criterion for  
430 this condition). Variance around the mean waveforms is shown as shadow. Green: Related  
431 condition; blue: Chimera condition; red: unrelated condition.

432

### 433 **Experimental Results: Behavioral Findings**

434 Following each passage, participants were asked to decide whether each word shown on  
435 screen was related or unrelated to the passage they had just read. Related words were both scored  
436 as “correctly identified” if the participants indicated they were related to the passage; unrelated  
437 words were similarly coded if they were marked as unrelated. For the related words, participants

438 correctly identified on average 45.29% (SD: 21.116) of words as related in the digital medium,  
439 and 44.18% (SD: 21.558) in the print medium. For unrelated probes, on average 96.92% (SD:  
440 4.913) of words in the digital medium and 96.68% (SD: 7.561) in the print medium were  
441 selected as unrelated to the passage. For chimera words, there was no error criterion; 15.33%  
442 (SD: 16.22) of the chimera words were identified as “related” in the digital medium and 15.44%  
443 (SD: 14.22) as “related” in the print medium. A two-way repeated measures ANOVA revealed  
444 no interaction between medium and category ( $F(1, 58) = .179, p = .674$ ) or main effect of  
445 medium ( $F(1, 58) = .505, p = .480$ ); however, there was a main effect of condition ( $F(1, 58) =$   
446  $277.261, p < .001$ ). Planned comparisons ( $t$ -tests) confirmed significant differences in accuracy  
447 between conditions, with unrelated words being identified significantly more accurately than  
448 related words (following text reading in the digital medium:  $t(58) = -16.314, p < .001$ ; print  
449 medium:  $t(58) = -15.382, p < .001$ ).

450         Reaction times for each word were also recorded for each participant. Following digital  
451 text reading, average reaction time for related words was 1,547.064 ms ( $SD = 490.124$ ), for the  
452 chimera words was 1,454.827 ms ( $SD = 472.169$ ), and for the unrelated words was 1,352.923 ms  
453 ( $SD = 481.730$ ). In the print medium, average reaction time for the related words was 1,502.545  
454 ms ( $SD = 506.423$ ), for the chimera words was 1530.480 ms ( $SD = 559.819$ ), and for the  
455 unrelated words was 1,319.922 ms ( $SD = 420.521$ ). A two-way repeated measures ANOVA  
456 revealed a significant interaction between medium and category ( $F(2, 116) = 4.278, p = .016$ ).  
457 There was no significant effect of medium, confirming that reaction times to individual words  
458 following reading in print or on a screen did not differ. A significant simple main effect was  
459 found for word category ( $F(2, 116) = 23.334, p < .001$ ), and planned comparisons (paired-  
460 samples  $t$ -tests) confirmed that, in the digital medium, reaction times to the related words were

461 significantly longer than to either the chimera ( $t(58) = 3.352, p < .001$ ) or the unrelated words ( $t$   
462 ( $58) = 4.922, p < .001$ ); however, reaction times did not differ significantly between chimera and  
463 unrelated words ( $t = 2.684, p = .005$ ). In the print medium, reaction times to the related and  
464 chimera words were both significantly longer than to the unrelated words (related vs. unrelated:  $t$   
465 ( $58) = 4.389, p < .001$ ; chimera vs. unrelated:  $t(58) = 5.216, p < .001$ ), but the reaction times  
466 were not different between related and chimera words ( $t(58) = -0.790, p = .433$ ).

## 467 **Comprehension Accuracy**

### 468 **Immediate Recall Comprehension Task**

469 The reading of each passage was followed by a set of eight sentence verification items to  
470 evaluate participants' comprehension of the preceding passage. The eight items were of four  
471 different types, as described above: explicit, paraphrase, meaning change, and unrelated. These  
472 four types of questions were designed to probe different aspects of understanding of the text and  
473 different levels of difficulty with respect to recall as well as recognition of ideas and concepts  
474 from the texts.

475 Responses to the sentence verification items were not recorded for 9 of the 59  
476 participants due to software malfunction during data collection. Thus, the results below include  
477 data for 50 participants. Accuracy for these items is presented below in Table 3, separated by  
478 medium.

479 **Table 3. Mean percent correct responses for each sentence verification item type,**  
480 **immediate presentation.**

| Sentence Verification | Digital Text Presentation | Print Text Presentation |
|-----------------------|---------------------------|-------------------------|
| Item Type             | % Correct (SD)            | % Correct (SD)          |

---

|                |                 |                 |
|----------------|-----------------|-----------------|
| Explicit       | 64.33% (21.96%) | 65.33% (20.16%) |
| Paraphrase     | 52.33% (27.56%) | 54.00% (22.22%) |
| Meaning Change | 30.00% (14.68%) | 27.67% (18.63%) |
| Unrelated      | 78.33% (22.14%) | 84.00% (19.33%) |
| TOTAL          | 56.25% (28.17%) | 57.75% (28.59%) |

---

481 These items were presented immediately following the EEG experimental task. Accuracy is  
482 separated based on medium of passage presentation.

483

484 A two-way repeated measures ANOVA was run to determine the statistical significance  
485 of the interaction between medium of presentation and accuracy across question types. No  
486 significant interaction was found (medium x item type:  $F(3, 147) = 0.89, p = .449$ ), and the main  
487 effect of medium was also non-significant ( $F(1, 49) = 0.561, p = .457$ ). However, the main  
488 effect of question type was significant ( $F(3, 147) = 85.105, p < .001$ ), and planned comparisons  
489 ( $t$ -tests) revealed that accuracy for each of the question types was significantly different, in the  
490 following order from most to least accurate: Unrelated  $>$  Explicit ( $t(198) = 5.528, p < .001$ );  $>$   
491 Paraphrase ( $t(192.19) = 3.586, p < .001$ );  $>$  Meaning Change ( $t(173.14) = 8.107, p < .001$ ).

## 492 **Delayed (Retention) Comprehension Task**

493 In addition to collecting responses to the sentence verification items about each passage  
494 immediately following presentation, we asked participants to answer the same questions again  
495 within 24 hours after completing the lab session. However, the survey responses were accepted  
496 up to 168 hours (seven days) following the lab session. The goal was to gauge retention of the  
497 information presented in the passages, and to compare retention between media. Mean accuracy  
498 for each item type is presented below in Table 4.

499

500 **Table 4. Mean percent correct responses for each sentence verification item type, delayed**

501 **presentation.**

| Sentence Verification | Digital Text Presentation | Print Text Presentation |
|-----------------------|---------------------------|-------------------------|
| Item Type             | % Correct (SD)            | % Correct (SD)          |
| Explicit              | 63.33% (22.59%)           | 63.33% (19.22%)         |
| Paraphrase            | 49.33% (20.75%)           | 48.67% (23.77%)         |
| Meaning Change        | 24.67% (15.87%)           | 25.33% (19.70%)         |
| Unrelated             | 63.33% (29.16%)           | 65.67% (28.45%)         |
| TOTAL                 | 50.17% (27.45%)           | 50.75% (28.12%)         |

502 These items were presented 1-7 days following the EEG experimental task. Accuracy is  
503 separated based on medium of passage presentation.

504

505 The pattern of responses to the delayed sentence verification task is similar to that of the  
506 immediate recall comprehension evaluation: meaning change items were responded to with the  
507 lowest accuracy, followed by paraphrase items. In this case, the accuracy for explicit and  
508 unrelated items appears equivalent, while overall accuracy is slightly lower for delayed vs.  
509 immediate evaluation. These results were confirmed with statistical analysis. A two-way  
510 repeated measures ANOVA was conducted, and no significant interaction between medium and  
511 item type was found ( $F(3, 147) = .195, p = .90$ ). The main effect of medium was also non-  
512 significant ( $p = .75$ ), but the main effect of item type was found to be significant ( $F(2.37,$   
513  $115.91) = 41.240, p < .001$ ). Planned comparisons ( $t$ -tests) showed that accuracy for unrelated  
514 and explicit items was not significantly different, but both were responded to significantly more



515 accurately than paraphrase and meaning change items. Accuracy of responses to the paraphrase  
516 question type was greater than to the meaning change question type.

517         Additionally, we sought to identify significant differences between immediate recall  
518 comprehension (SVT items presented during the experiment run) and later retention accuracy  
519 (SVT items completed via online survey after at least 24 hours elapsed). Two separate two-way  
520 repeated measures ANOVAs were run, to observe the effects of time (immediate vs. delayed)  
521 and item type separately across the two mediums. For the digital passages, a significant  
522 interaction between time and item type was found ( $F(3, 132) = 3.204, p = .030$ ), and the main  
523 effects of time ( $F(1, 44) = 13.02, p < .001$ ) and item type ( $F(3, 132) = 49.697, p < .001$ ) were  
524 also significant. Similarly, for the print passages, there was a significant interaction between time  
525 and item type ( $F(3, 132) = 5.448, p = .001$ ) as well as significant main effects (time:  $F(1, 44) =$   
526  $13.020, p < .001$ ; item type:  $F(2.26, 99.64) = 60.197, p < .001$ ). The effects of time reflected that  
527 total accuracy was significantly higher in the immediate responses to comprehension items than  
528 for the delayed responses ( $t(397.73) = 2.187, p = .03$ ), while the interaction was driven by a  
529 difference in accuracy rates for the unrelated SVT items: on average 16.67% higher when  
530 responded to immediately after the passage reading task, compared to delayed responses ( $t$   
531  $(180.88) = 4.698, p < .001$ ). The significant main effects of item type reflected that accuracy  
532 rates continued to follow the general pattern previously observed (Unrelated > Explicit:  $t(379) =$   
533  $3.669, p < .001$ ; > Paraphrase:  $t(392.61) = 5.814, p < .001$ ; > Meaning Change:  $t(365.09) =$   
534  $11.66, p < .001$ ). With respect to delayed responses, the meaning change item type again yielded  
535 significantly fewer accurate responses than all other question types (Unrelated:  $t(165.42) =$   
536  $11.699, p < .001$ ; Explicit:  $t(192.3) = 13.85, p < .001$ ; Paraphrase:  $t(189.09) = 8.433, p < .001$ ).  
537 Paraphrase item types yielded significantly fewer accurate responses than the explicit and

538 unrelated items ( $t(197.57) = -4.671, p < .001$ ;  $t(186.27) = -4.273, p < .001$ , respectively).

539 However, responses to the explicit and unrelated items did not differ with respect to accuracy ( $t$

540  $(182.24) = 0.327, p = .744$ ).

## 541 **Discussion**

542 As alluded to above, this study took place against a complex background of research and  
543 environmental factors that contribute to the importance of the findings. The COVID pandemic  
544 was a time of unprecedented disruption to our educational systems, with as-yet little understood  
545 consequences for students. Amid pre-existing doubts about the impact of digital media on the  
546 development of reading and related skills, children were abruptly forced into online instruction  
547 and even more of their engagement with text, at all levels, now happens through various digital  
548 devices. These disruptions highlighted a challenge already being faced by educators: to  
549 understand how reading comprehension and learning are changing in the age of digital  
550 information. This investigation of the neural correlates of depth of processing during reading  
551 discourse across mediums in middle-school students is the first to apply event-related  
552 methodologies to this question, and is novel in its use of the N400 as an index. We drew upon  
553 the depth of processing theory introduced by Craik and Lockhart [28] to provide a theoretical  
554 framework for the investigation, alongside Kintsch's [29, 30] view that text comprehension is a  
555 dynamic process of constructing meaning from semantic relations among words in the text and  
556 one's stored knowledge about subject matter. We proposed that how readers engage with  
557 text/reading material may be a crucial determinant of differences in depth of processing for the  
558 semantic information contained in a text, consequently affecting the robustness of semantic  
559 memory structures that are established in support of reading comprehension. We extended the

560 standard applications of the N400 to provide an index of processing depth associated with two  
561 mediums of text presentation: digital (via a laptop screen) and print (via a printed page).

562 We predicted that N400 responses to reading text presented in digital and print formats  
563 would differ. These predictions were largely supported by the data presented above. The  
564 waveforms indicate distinct brain responses across the two mediums. Consistent with our  
565 predictions, when passages were read on a laptop (digital), responses to subsequently presented  
566 words in the chimera (moderately related/moderately unrelated) category evoked activations  
567 similar to those associated with words that were unrelated to the text. This finding can be  
568 observed in the waveforms (Fig 3), and is supported by the lack of statistical significance in  
569 amplitude differences between chimera and unrelated word responses in the digital condition.  
570 The N400 waveforms in these two conditions can be observed to differ significantly from the  
571 response to related words.

572 In the print medium, we predicted that the N400 responses for the three conditions would  
573 be graduated with unrelated words producing the greatest negativity, the response to related  
574 words being the most attenuated, and responses to chimera words falling between. However, the  
575 N400 waveform patterned differently than expected (Fig 4). Mean amplitude values within the  
576 N400 time window were significantly different between related and unrelated words, and  
577 between chimera and unrelated words – consistent with our predictions. However, contrary to  
578 prediction, the amplitude differences in response to related and chimera stimuli were not  
579 significant.

580 Within the context of the depth of processing theory [28] the primary experimental  
581 manipulation in this study related to the chimera word stimuli. As prior behavioral studies have  
582 suggested, reading on a digital device promotes shallow reading. When classifying the chimera

583 words, we stated that these stimuli could be perceived as related or unrelated given the center  
584 clustering of their word relatedness rating. Whether chimeras are perceived as related or  
585 unrelated to the text may depend on the strength of the encoded memory traces established  
586 during text discourse processing. Therefore, perception of chimera words as unrelated words  
587 would be consistent with shallow discourse processing as hypothesized in digital text reading,  
588 whereas chimera words perceived as related would be consistent with deeper discourse  
589 processing as observed in print reading.

590 Behaviorally, there was no distinction between classification of the chimera words by  
591 study participants following the digital or print presentations of texts; in both conditions, chimera  
592 words were most frequently identified as being “unrelated” to the text. The longer reaction times  
593 to related words than words in other probe conditions likely reflect response competition (e.g.,  
594 [66]), and the patterning of reaction times between chimera and related words in the print  
595 condition, and between chimera and unrelated words in the digital condition, is an expected  
596 finding given the study prediction that more robust semantic networks were expected to develop  
597 following exposure to print vs. digital texts. However, observations of the ERP responses to  
598 chimera words provide a deeper insight.

599 The semantic judgement task prompted participants to decide whether presented probe  
600 words were related or unrelated, potentially shaping brain responses specific to the task at hand.  
601 Therefore, how deeply a participant read the text would likely contribute to whether they  
602 perceived the chimera word probes as either related or unrelated. This seems to bear out in the  
603 waveforms and statistics: responses to the chimera words track with responses to the unrelated  
604 words in the digital condition, and with responses to the related words in the print condition. The  
605 observed responses to the chimera word condition may index the robustness of context models

606 for the text: if robust models are created, chimeras can be situated within the model affording  
607 greater processing efficiency, whereas when such words are situated within a less robust  
608 contextual model, as would be generated under shallower reading, the opposite would be  
609 expected. Under this interpretation, these ERP responses align with the study hypothesis and may  
610 indicate that a more “robust” semantic network was derived in response to texts presented in the  
611 print medium. Hence, we propose that the N400 brain responses observed are consistent with a  
612 finding of deeper text processing in print compared to digital media.

613         The increased use of digital materials alongside paper-based materials in learning  
614 environments has motivated many studies on the efficacy of reading and learning in one format  
615 versus the other (e.g., [1, 2, 5]). Investigations of reading comprehension and learning measured  
616 in terms of reading ability, reading rate, eye movement, and factual recall, have found no  
617 differences in student performance between working in the two mediums (e.g., [9, 14, 67, 68]).  
618 The present study is the first to evaluate depth of processing for print and digital informational  
619 texts in middle-school children using a brain measure (N400 ERP). Our findings contribute to  
620 this landscape by providing insights about the neurocognitive processing underlying reading  
621 comprehension. The study outcomes reveal differences in how the brain processes expository  
622 text when presented in digital and print mediums, with the former suggesting more shallow  
623 engagement and the latter conferring deeper engagement. This effect could indicate a “print  
624 advantage” with respect to depth of processing, in support of previous behavioral research [2].

## 625 **Study Limitations and Delimitations**

626         As with any study that seeks to break new ground, there are important limitations to  
627 acknowledge and address in future work. Our study sample, despite our recruitment efforts, was  
628 skewed towards higher parental income and higher parental education levels and therefore does

629 not adequately represent the diversity of the target populations (NYC metropolitan area). Future  
630 work should direct efforts towards recruitment of participants from a wider range of SES and  
631 parental educational backgrounds to determine whether the findings hold across demographic  
632 variables.

633 In addition, samples from communities without ready access to the internet would be  
634 important to evaluate since internet access and other amenities likely to predispose participants  
635 towards digital consumption of information may be lacking, so that students in such communities  
636 may be less experienced or less prepared to read texts digitally. This could lead to different  
637 patterns of reading preference, experience, and relative advantage; for example, less familiarity  
638 with digital media could be associated with less robust semantic memory structures established  
639 for information presented in this medium, therefore resulting in lower processing efficiency.

640 Our participants were middle-school children in the New York City metropolitan area,  
641 mostly reporting post-secondary parental education and mid-to-high SES backgrounds. Our  
642 entire sample was born after 2010, and so all can be considered “digital natives” or members of  
643 “iGen” (in the sense defined by Twenge et al. [69]). This strongly suggests that digital exposure  
644 would have been optimal for these participants throughout their lives, predisposing them to be  
645 expert consumers of text and other kinds of information in digital formats. It is also possible that  
646 our sample may have been taught or absorbed strategies for reading and learning online given the  
647 prevalence of online schooling in New York City during the pandemic that preceded our data  
648 collection. Within the current sample, there were no significant differences between the medium  
649 of presentation in comprehension of the texts, reading times, or performance on a measure of  
650 information retention. Nonetheless, the N400 effects remain; while our findings suggest  
651 differences in the efficiency of neurocognitive processing across different media, further research

652 is needed. Overall, the underlying nature of the interaction between experience with particular  
653 media and reading comprehension remains to be addressed.

654         Despite earlier debates about the context of digital adaptations in learning and differences  
655 in access to digital media (summarized by Evans & Robertson [70]), iGen access and exposure to  
656 digital media appears uniform across gender, race/ethnicity, and socioeconomic status [69] –  
657 even leading to concerns that there has been a displacement of so-called “legacy media” (a term  
658 encompassing everything from print books and magazines to television). Carr [71] and Wolf [72]  
659 have also suggested that the seemingly shallow processing associated with accessing texts in  
660 digital formats could relate to readers being primed by the larger culture of the digital age, to  
661 access information in smaller “bits” and to process it less deeply when reading from a screen.  
662 Despite such concerns, the majority of our sample identified a preference for print over digital  
663 media (similar to that observed by Kretzschmar et al. [14]), and we observed a corresponding  
664 print advantage in the N400 data for semantic processing of text-related concepts.

665         Our study parameters were necessarily delimited in many ways. We selected middle-  
666 school children for our cross-sectional study design, to reflect the age at which brain adaptations  
667 for successful attainment of reading skills are considered to be underway [73, 74]. Chall [75]  
668 identified our selected age range as critical in reading development, having proposed a shift in  
669 fourth grade from “learning to read” to “reading to learn” – based on the proposal that early  
670 learning of basic reading-related skills (such as grapheme-to-phoneme correspondences) shifts  
671 around this age to higher-level skills including reading comprehension. Hence, considerations of  
672 earlier stages in reading development, and how these adaptations interact with exposure to texts  
673 in different mediums, limit the generalizability of our findings.

674 Other neurophysiological approaches to understanding reading development provide  
675 evidence to suggest that a focus on older age groups could also be relevant for future work. For  
676 example, Coch [76] used the N400 to investigate orthographic, semantic, and phonological  
677 processing in children from 3rd-5th grade, as well as college-age students. Participants were  
678 presented with real words, pseudowords, non-pronounceable letter strings, false font strings, and  
679 animal names. While an adult-like response was observed for stimuli tapping into semantic and  
680 phonological processing, the child participants (but not the college students) showed responses to  
681 false font strings similar to their word reading responses. Coch proposed that this changes by  
682 adulthood due to extensive reading experience and fine-tuned word processing; but it is not clear  
683 at what age automaticity might be attained and what specific neural processes might index such  
684 attainment. Until recently, there has been a paucity of evidence-based support for pedagogical  
685 practice and policy (e.g., [77]); hence, there is a need to evaluate the application of  
686 neurophysiological measures to support effective approaches to developing skilled deep readers.

687 Another study limitation is instantiated in the limited number of standardized measures  
688 conducted to ensure that participants were typically developing readers for their grade and age.  
689 Time constraints related to the anticipated average attention span of our target population  
690 prohibited the inclusion of other potentially valuable measures. In the future, measures of  
691 vocabulary and reading experience could offer deeper insights regarding individual differences.  
692 Additionally, we generated recall and retention comprehension question as one measure to  
693 ensure equivalency across passages. Unfortunately, missing data from both the recall and  
694 retention assessments, compounded by the fact that there were only two items for each question  
695 type, made comparisons with the N400 mean amplitude measure difficult.



696           During our development of the text passages used as stimuli in this study, we made a  
697 decision to work with expository or informational texts. This decision was based on meta-  
698 analyses [1, 2] showing that reading performance advantages when reading printed text on paper  
699 versus digital formats held for expository and informational texts but not narrative texts. The  
700 selection of expository text allowed us to more effectively control propositional counts for each  
701 passage, and to develop passages similar to those likely encountered by children in their learning  
702 environments. However, it is possible that distinct effects on indices of neural engagement,  
703 and/or behavioral indices of comprehension, could be identified if the texts were narrative in  
704 nature. Comparisons between responses to matched sets of narrative and expository texts would  
705 be valuable in future work.

## 706 **Conclusions**

707           As we have described here, this study marks the first step towards systematic application  
708 of neurophysiological methods to understand the implications and neural underpinnings of  
709 reading in print vs. digital media, at a crucial stage in literacy acquisition. An important question  
710 raised by these findings concerns the implications for classroom instruction of reading and  
711 learning via paper-based texts compared to texts delivered on digital platforms. The question is  
712 particularly relevant given the near ubiquitous use of digital platforms for delivery of instruction  
713 and information at school and at home.

714           For reasons related to study delimitations and limitations we think it too early to generate  
715 a set of recommendations for adaptation in the classroom. However, we do think that these study  
716 outcomes warrant adding our voices to those of Delgado et al. [2] in suggesting that we should  
717 not yet throw away printed books, since we were able to observe in our participant sample an  
718 advantage for depth of processing when reading from print. Applications for digital reading

719 should not be dismissed, either: the observation of a potential print advantage does not negate the  
720 value of rapid access to information that could be supported by digital reading. It may be that  
721 classroom practices should strategically match reading strategies and mediums to task, such that  
722 printed media are employed when deeper processing is required while digital access to text is  
723 utilized for other needs.

724 Another reason not to dismiss digital reading platforms is their potential to benefit  
725 children with reading disabilities. Research in this area suggests that digital reading strategies  
726 may be utilized in support of reading proficiency [78] and comprehension [79] in this population.  
727 However, reading disabilities are vastly heterogeneous, and there are concomitant difficulties  
728 with identification (e.g., [80]), alongside a corresponding array of interacting causal mechanisms  
729 that need to be described at multiple levels - at least, behaviorally, neurophysiologically, and  
730 genetically (e.g., [81]). Hence, further investigations of the effectiveness of digital and print text  
731 presentations for dyslexia and other reading disabilities will be needed.

732

733

## 734 **Acknowledgements**

735           A special thanks to the incredible research team from the Neurocognition of Language  
736 Lab at Teachers College, including Sarah Bennett, M.S., Girija Chatufale, M.S., Kenny Fabara,  
737 M.S., Kai Gilchrist, M.S., Zeina Haidar, M.S., Luiza Lodder, M.S., Emily Mantaro, M.S.,  
738 Michela Thomsen, M.S., and Huiyu (Bonnie) Yang, M.S. We also thank Dakota Egglefield,  
739 Ph.D., for her contributions to every aspect of our behavioral data collection; and Alexa  
740 Monachino for support during data analysis applications. We want to thank Dr. Kara Federmeier  
741 for her invaluable suggestions on earlier versions of this article, and Dr. Trey Avery for his  
742 continued support with the technology and the data. This research would not be possible without  
743 the wonderful families and participants who let us borrow their magnificent brains – our deep  
744 appreciation for their interest, support, and time.

745

## 746 **References**

- 747 1. Clinton V. Reading from paper compared to screens: A systematic review and meta-  
748 analysis. *J Res Read.* 2019 Jan 13;42(2):288–325. [http://doi.org/10.1111/1467-](http://doi.org/10.1111/1467-9817.12269)  
749 [9817.12269](http://doi.org/10.1111/1467-9817.12269)
- 750 2. Delgado P, Vargas C, Ackerman R, Salmerón L. Don't throw away your printed books:  
751 A meta-analysis on the effects of reading media on reading comprehension. *Educ Res*  
752 *Rev.* 2018 Nov;25:23–38. <https://doi.org/10.1016/j.edurev.2018.09.003>
- 753 3. Rideout VJ, Foehr UG, Roberts DF. Generation M2: Media in the lives of 8- to 18-year-  
754 olds. Henry J. Kaiser Family Foundation; 2010.
- 755 4. Sidi Y, Shpigelman M, Zalmanov H, Ackerman R. Understanding metacognitive  
756 inferiority on screen by exposing cues for depth of processing. *Learn Instr.* 2017  
757 Oct;51:61–73. <https://doi.org/10.1016/j.learninstruc.2017.01.002>
- 758 5. Singer LM, Alexander PA. Reading across mediums: Effects of reading digital and print  
759 texts on comprehension and calibration. *J Exp Educ.* 2016 Mar 9;85(1):155–72.  
760 <https://doi.org/10.1080/00220973.2016.1143794>
- 761 6. DeJong MT, Bus AG. The efficacy of electronic books in fostering kindergarten  
762 children's emergent story understanding. *Read Res Q.* 2004 Oct 12;39(4):378–93.  
763 <https://doi.org/10.1598/rrq.39.4.2>
- 764 7. Dündar H, Akçayır M. Tablet vs. paper: The effect on learners' reading performance.  
765 *International Electronic J Elem Educ.* 2012 Jan 1;4(3):441–50.
- 766 8. Kong Y, Seo YS, Zhai L. Comparison of reading performance on screen and on paper: A  
767 meta-analysis. *Comput Educ.* 2018 Aug;123:138–49.  
768 <https://doi.org/10.1016/j.compedu.2018.05.005>.

- 769 9. Margolin SJ, Driscoll C, Toland MJ, Kegler JL. E-readers, computer screens, or paper:  
770 Does reading comprehension change across media platforms? *Appl Cogn Psychol*. 2013  
771 May 28;27(4):512–9. <https://doi.org/10.1002/acp.2930>.
- 772 10. Nichols M. Reading and studying on the screen: An overview of literature towards good  
773 learning design practice. *J Open Flex Dist Learn*. 2016 Aug 25;20(1):33–43.  
774 [doi/10.3316/informit.195571684952519](https://doi.org/10.3316/informit.195571684952519)
- 775 11. Noyes JM, Garland KJ. Computer-vs. paper-based tasks: Are they equivalent? *Ergonom*.  
776 2009;51:1352–75. <https://doi.org/10.1080/00140130802170387>.
- 777 12. Singer LM, Alexander PA. Reading on paper and digitally: What the past decades of  
778 empirical research reveal. *Rev Educ Res*. 2017 Jul 21;87(6):1007–41.  
779 <https://doi.org/10.3102/0034654317722961>
- 780 13. Wang S, Jiao H, Young MJ, Brooks T, Olson J. Comparability of computer-based and  
781 paper-and-pencil testing in K–12 reading assessments. *Educ Psychol Meas*. 2007 Sep  
782 12;68(1):5–24. <https://doi.org/10.1177/0013164407305592>.
- 783 14. Kretzschmar F, Pleimling D, Hosemann J, Füssel S, Bornkessel-Schlesewsky I,  
784 Schlewsky M. Subjective impressions do not mirror online reading effort: Concurrent  
785 eeg-eyetracking evidence from the reading of books and digital media. *PLoS ONE*. 2013  
786 Feb 6;8(2):e56178. <https://doi.org/10.1371/journal.pone.0056178>
- 787 15. Lenhard W, Schroeders U, Lenhard A. Equivalence of screen versus print reading  
788 comprehension depends on task complexity and proficiency. *Discourse Process*. 2017  
789 May 4;54(5-6):427–45. <https://doi.org/10.1080/0163853x.2017.1319653>

- 790 16. Singer LM, Alexander PA, Berkowitz LE. Effects of processing time on comprehension  
791 and calibration in print and digital mediums. *Int J Exp Educ*. 2017 Dec 21;87(1):101–15.  
792 <https://doi.org/10.1080/00220973.2017.1411877>.
- 793 17. Connell C, Bayliss L, Farmer W. Effects of e-book readers and tablet computers on  
794 reading comprehension. *Int J Instruc Media*. 2012;39(3):131–40.
- 795 18. Daniel DB, Woody WD. E-textbooks at what cost? Performance and use of electronic v.  
796 print texts. *Comput Educ*. 2013 Mar;62:18–23.  
797 <https://doi.org/10.1016/j.compedu.2012.10.016>.
- 798 19. Kerr MA, Symons SE. Computerized presentation of text: effects on children’s reading of  
799 informational material. *Read Writ*. 2006 Feb;19(1):1–19. [https://doi.org/10.1007/s11145-](https://doi.org/10.1007/s11145-003-8128-y)  
800 [003-8128-y](https://doi.org/10.1007/s11145-003-8128-y)
- 801 20. Kim HJ, Kim J. Reading from an LCD monitor versus paper: Teenagers’ reading  
802 performance. *Int J Res Stud Educ Technol*. 2013 Apr 5;2(1).  
803 <https://doi.org/10.5861/ijrset.2012.170>
- 804 21. Deschryver M, Spiro RJ. New forms of deep learning on the web: Meeting the challenge  
805 of cognitive load in conditions of unfettered exploration in online multimedia  
806 environments. In: Zheng R, editor. *Cognitive effects of multimedia learning*. IGI Global  
807 eBooks; 2009. p. 134–52. <https://doi.org/10.4018/978-1-60566-158-2.ch008>
- 808 22. Ackerman R, Lauterman T. Taking reading comprehension exams on screen or on paper?  
809 A metacognitive analysis of learning texts under time pressure. *Comput Hum Behav*.  
810 2012 Sep;28(5):1816–28. <https://doi.org/10.1016/j.chb.2012.04.023>.

- 811 23. Wästlund E, Reinikka H, Norlander T, Archer T. Effects of VDT and paper presentation  
812 on consumption and production of information: Psychological and physiological factors.  
813 *Comput Hum Behav.* 2005 Mar;21(2):377–94.
- 814 24. Lauterman T, Ackerman R. Overcoming screen inferiority in learning and calibration.  
815 *Comput Hum Behav.* 2014 Jun;35:455–63. <https://doi.org/10.1016/j.chb.2014.02.046>
- 816 25. Singer Trakhman LM, Alexander PA, Berkowitz LE. Effects of processing time on  
817 comprehension and calibration in print and digital mediums. *J Exp Educ.* 2017 Dec  
818 21;87(1):101–15. <https://doi.org/10.1080/00220973.2017.1411877>
- 819 26. Mangen A, Walgermo BR, Brønnick K. Reading linear texts on paper versus computer  
820 screen: Effects on reading comprehension. *Int J Educ Res.* 2013 Jan;58(58):61–8.  
821 <https://doi.org/10.1016/j.ijer.2012.12.002>
- 822 27. Eshet-Alkalai Y, Geri N. Does the medium affect the message? The influence of text  
823 representation format on critical thinking. *Hum Sys Manag.* 2007 Dec 20;26(4):269–79.  
824 <https://doi.org/10.3233/hsm-2007-26404>
- 825 28. Craik FIM, Lockhart RS. Levels of processing: A framework for memory research. *J*  
826 *Verbal Learning Verbal Behav.* 1972 Dec;11(6):671–84.
- 827 29. Kintsch W. *Comprehension: a paradigm for cognition.* Cambridge: Cambridge Univ.  
828 Press; 1998.
- 829 30. Kintsch W. Psychological models of reading comprehension and their implication for  
830 assessment. In: Sabatino J, Albro E, O'Reilly T, editors. *Measuring up: Advances in how*  
831 *we assess reading ability.* Lanham, MD: Rowman and Littlefield Publishers, Inc.; 2012.  
832 p. 21–38.

- 833 31. Craik FIM, Tulving E. Depth of processing and the retention of words in episodic  
834 memory. *J Exp Psychol: Gen.* 1975;104(3):268–94. <https://doi.org/10.1037/0096->  
835 3445.104.3.268
- 836 32. Tulving E. Episodic and semantic memory. In: Tulving E, Donaldson W, editors.  
837 *Organization of memory.* Cambridge, MA: Academic Press; 1972. p. 381–403.
- 838 33. Anderson J, Reder L. An elaborative processing explanation of depth of processing. In:  
839 Cermak L, Craik F, editors. *Levels of processing in human memory.* Mahwah, NJ:  
840 Lawrence Earlbaum Associates; 1979. p. 385–404.
- 841 34. Federmeier KD, Laszlo S. Time for meaning: Electrophysiology provides insights into  
842 the dynamics of representation and processing in semantic memory. In: Ross B, editor.  
843 *The psychology of learning and motivation.* Cambridge, MA: Elsevier Academic Press;  
844 2009. p. 1–44. [https://doi.org/10.1016/S0079-7421\(09\)51001-8](https://doi.org/10.1016/S0079-7421(09)51001-8)
- 845 35. Kutas M, Federmeier KD. Thirty years and counting: Finding meaning in the N400  
846 component of the event-related brain potential (ERP). *Ann Rev Psychol.* 2011 Jan  
847 10;62(1):621–47. <https://doi.org/10.1146/annurev.psych.093008.131123>
- 848 36. Kincaid J, Fishburne R, Rogers R, Chissom B. Derivation of new readability formulas  
849 (Automated Readability Index, Fog Count, and Flesch Reading Ease formula) for Navy-  
850 enlisted personnel. *Research Branch Report 8-75: Chief of Naval Technical Training;*  
851 1975.
- 852 37. Gunning R. *The technique of clear writing.* New York: Mcgraw-Hill Book Co; 1952.
- 853 38. McLaughlin G. SMOG grading: A new readability formula. *J Read.* 1969;12(8):639–46.
- 854 39. Bovair S, Kieras D. A guide to propositional analysis for research on technical prose.  
855 *Technical Report No. 8, University of Arizona;* 1981.



- 856 40. Kintsch W. The representation of meaning in memory. Hillsdale, NJ: Lawrence Erlbaum  
857 Associates; 1974.
- 858 41. Turner A, Greene E. The construction and use of a propositional text base. Institute for  
859 the Study of Intellectual Behavior Technical Report No. 63, University of Colorado;  
860 1977.
- 861 42. Royer JM. Developing reading and listening comprehension tests based on the Sentence  
862 Verification Technique (SVT). *J Adol Adult Literacy*. 2001 Sep 1;45(1):30-41.  
863 <https://www.jstor.org/stable/40007629>
- 864 43. Kuperman V, Stadthagen-Gonzalez H, Brysbaert M. Age-of-acquisition ratings for  
865 30,000 English words. *Beh Res Meth*. 2012 Dec;44:978-90.
- 866 44. Fellbaum C. A semantic network of English: the mother of all WordNets. *Comp*  
867 *Humanities*. 1998 Mar;32:209-20. <https://doi.org/10.1023/A:1001181927857>
- 868 45. Miller GA. WordNet: a lexical database for English. *Commun ACM*. 1995 Nov  
869 1;38(11):39-41.
- 870 46. Princeton University. WordNet (Version 3.0). 2010. <https://wordnet.princeton.edu/>
- 871 47. Brysbaert M, New B. Moving beyond Kučera and Francis: A critical evaluation of  
872 current word frequency norms and the introduction of a new and improved word  
873 frequency measure for American English. *Beh Res Meth*. 2009 Nov;41(4):977-90.  
874 <https://doi.org/10.3758/brm.41.4.977>
- 875 48. Coltheart M. The MRC psycholinguistic database. *Q J Exp Psychol*. 1981  
876 Nov;33(4):497-505. <https://doi.org/10.1080/14640748108400805>

- 877 49. Brysbaert M, Warriner AB, Kuperman V. Concreteness ratings for 40 thousand generally  
878 known English word lemmas. *Beh Res Meth.* 2014 Sep;46:904-11.  
879 <https://doi.org/10.3758/s13428-013-0403-5>
- 880 50. Dubossarsky H, De Deyne S, Hills TT. Quantifying the structure of free association  
881 networks across the life span. *Dev Psychol.* 2017 Aug;53(8):1560.  
882 <https://doi.org/10.1037/dev0000347>
- 883 51. Lindsay BG. Mixture models: Theory, geometry, and applications. NSF-CBMS; 1995.
- 884 52. McLachlan G, Peel, D. Finite mixture models. Hoboken, NJ: John Wiley & Sons; 2000.
- 885 53. Wechsler D. Wechsler intelligence scale for children (5th ed.). New York, NY: Pearson;  
886 2014.
- 887 54. Woodcock, R.W. Woodcock reading mastery tests (3rd ed.). New York, NY: Pearson;  
888 2011.
- 889 55. Swanson HL. Generality and modifiability of working memory among skilled and less  
890 skilled readers. *J Educ Psychol.* 1992;84(4):473–88. [https://doi.org/10.1037/0022-](https://doi.org/10.1037/0022-0663.84.4.473)  
891 [0663.84.4.473](https://doi.org/10.1037/0022-0663.84.4.473)
- 892 56. Gabard-Durnam LJ, Mendez Leal AS, Wilkinson CL, Levin AR. The Harvard  
893 Automated Processing Pipeline for Electroencephalography (HAPPE): Standardized  
894 processing software for developmental and high-artifact data. *Front Neurosci.* 2018 Feb  
895 27;12. <https://doi.org/10.3389/fnins.2018.00097>
- 896 57. Monachino AD, Lopez KL, Pierce LJ, Gabard-Durnam LJ. The HAPPE plus Event-  
897 Related (HAPPE+ ER) software: A standardized preprocessing pipeline for event-related  
898 potential analyses. *Dev Cogn Neurosci.* 2022 Oct 1;57:101140.  
899 <https://doi.org/10.1101/2021.07.02.450946>

- 900 58. Šoškić A, Jovanović V, Styles SJ, Kappenman ES, Ković V. How to do better N400  
901 studies: reproducibility, consistency and adherence to research standards in the existing  
902 literature. *Neuropsychol Rev.* 2022 Sep;32(3):577-600.  
903 <https://doi.org/10.31234/osf.io/jp6wy>
- 904 59. Chwilla DJ, Brown CM, Hagoort P. The N400 as a function of the level of processing.  
905 *Psychophysiol.* 1995 May;32(3):274-85. [https://doi.org/10.1111/j.1469-](https://doi.org/10.1111/j.1469-8986.1995.tb02956.x)  
906 [8986.1995.tb02956.x](https://doi.org/10.1111/j.1469-8986.1995.tb02956.x)
- 907 60. Hald LA, Steenbeek-Planting EG, Hagoort P. The interaction of discourse context and  
908 world knowledge in online sentence comprehension. Evidence from the N400. *Brain Res.*  
909 2007 May 18;1146:210-8. <https://doi.org/10.1016/j.brainres.2007.02.054>
- 910 61. Kutas M. In the company of other words: Electrophysiological evidence for single-word  
911 and sentence context effects. *Lang Cogn Proc.* 1993 Nov 1;8(4):533-72.  
912 <https://doi.org/10.1080/01690969308407587>
- 913 62. Nieuwland MS, Van Berkum JJ. When peanuts fall in love: N400 evidence for the power  
914 of discourse. *J Cogn Neurosci.* 2006 Jul 1;18(7):1098-1111.  
915 <https://doi.org/10.1162/jocn.2006.18.7.1098>
- 916 63. Nieuwland MS, Otten M, Van Berkum JJ. Who are you talking about? Tracking  
917 discourse-level referential processing with event-related brain potentials. *J Cogn*  
918 *Neurosci.* 2007 Feb 1;19(2):228-36. <https://doi.org/10.1162/jocn.2007.19.2.228>
- 919 64. George MS, Mannes S. Global semantic expectancy and language comprehension. *J*  
920 *Cogn Neurosci.* 1994 Jan 1;6(1):70-83. <https://doi.org/10.1162/jocn.1994.6.1.70>

- 921 65. Van Berkum JJ, Brown CM, Zwitserlood P, Kooijman V, Hagoort P. Anticipating  
922 upcoming words in discourse: evidence from ERPs and reading times. *J Exp Psychol:*  
923 *Learn Mem Cogn.* 2005 May;31(3):443. <https://doi.org/10.1037/0278-7393.31.3.443>
- 924 66. Lupker SJ. The semantic nature of response competition in the picture-word interference  
925 task. *Mem Cogn.* 1979 Nov;7(6):485-95.
- 926 67. Bodmann SM, Robinson DH. Speed and performance differences among computer-based  
927 and paper-pencil tests. *J Educ Comp Res.* 2004 Jul;31(1):51-60.  
928 <https://doi.org/10.2190%2Fgrqq-yt0f-7lkb-f033>
- 929 68. Van de Velde C, von Grunau M. Tracking eye movements while reading: Printing press  
930 versus the cathode ray tube. *Percept* 2003 Jan;32:107.
- 931 69. Twenge JM, Martin GN, Spitzberg BH. Trends in US Adolescents' media use, 1976–  
932 2016: The rise of digital media, the decline of TV, and the (near) demise of print. *Psychol*  
933 *Pop Media Cult.* 2019 Oct;8(4):329. <https://doi.org/10.1037/ppm0000203>
- 934 70. Evans C, Robertson W. The four phases of the digital natives debate. *Hum Beh Emerg*  
935 *Technol.* 2020 Jul;2(3):269-77. <https://doi.org/10.1002/hbe2.196>
- 936 71. Carr N. *The shallows: What the Internet is doing to our brains.* New York, NY: WW  
937 Norton & Company; 2020 Mar 3.
- 938 72. Wolf M. *Reader come home: The reading brain in a digital world.* New York, NY:  
939 Harper Collins; 2018.
- 940 73. Dehaene S, Cohen L. The unique role of the visual word form area in reading. *Trends*  
941 *Cogn Sci.* 2011 Jun 1;15(6):254-62. <https://doi.org/10.1016/j.tics.2011.04.003>

- 942 74. McCandliss BD, Cohen L, Dehaene S. The visual word form area: expertise for reading  
943 in the fusiform gyrus. *Trends Cogn Sci*. 2003 Jul 1;7(7):293-9.  
944 [https://doi.org/10.1016/s1364-6613\(03\)00134-7](https://doi.org/10.1016/s1364-6613(03)00134-7)
- 945 75. Chall J. S. *Stages of reading development*. New York, NY: McGraw-Hill; 1983.
- 946 76. Coch D. The N400 and the fourth grade shift. *Dev Sci*. 2015 Mar;18(2):254-69.  
947 <https://doi.org/10.1111/desc.12212>
- 948 77. Slavin RE. How evidence-based reform will transform research and practice in education.  
949 *Educ Psychol*. 2020 Jan 2;55(1):21-31. <https://doi.org/10.1080/00461520.2019.1611432>
- 950 78. Gunter GA, Kenny RF. UB the director: Utilizing digital book trailers to engage gifted  
951 and twice-exceptional students in reading. *Gift Educ Int*. 2012 May;28(2):146-60.  
952 <https://doi.org/10.1177/0261429412440378>
- 953 79. Ertem IS. The effect of electronic storybooks on struggling fourth-graders' reading  
954 comprehension. *Turkish Online J Educ Technol*. 2010 Oct;9(4):140-55.80.
- 955 80. Wagner RK, Zirps FA, Edwards AA, Wood SG, Joyner RE, Becker BJ, Liu G, Beal B.  
956 The prevalence of dyslexia: A new approach to its estimation. *J Learn Dis*. 2020  
957 Sep;53(5):354-65. <https://doi.org/10.1177/0022219420920377>
- 958 81. Centanni T. Neural and genetic mechanisms of dyslexia. In: Argyropoulos G, editor.  
959 *Translational neuroscience of speech and language disorders*. New York, NY: Springer;  
960 2020. p. 47–65. [https://doi.org/10.1007/978-3-030-35687-3\\_4](https://doi.org/10.1007/978-3-030-35687-3_4)

961

962

Passage

Probe Word

Conditions -Random Presentation - Self-Advance

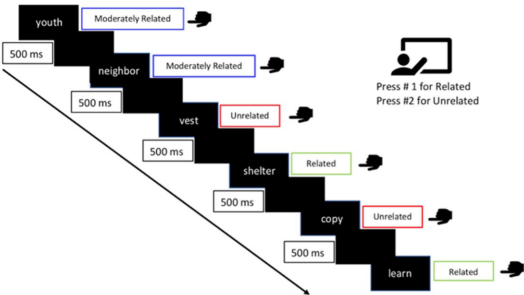

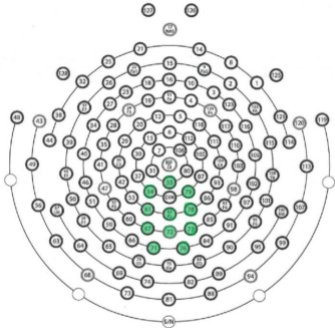

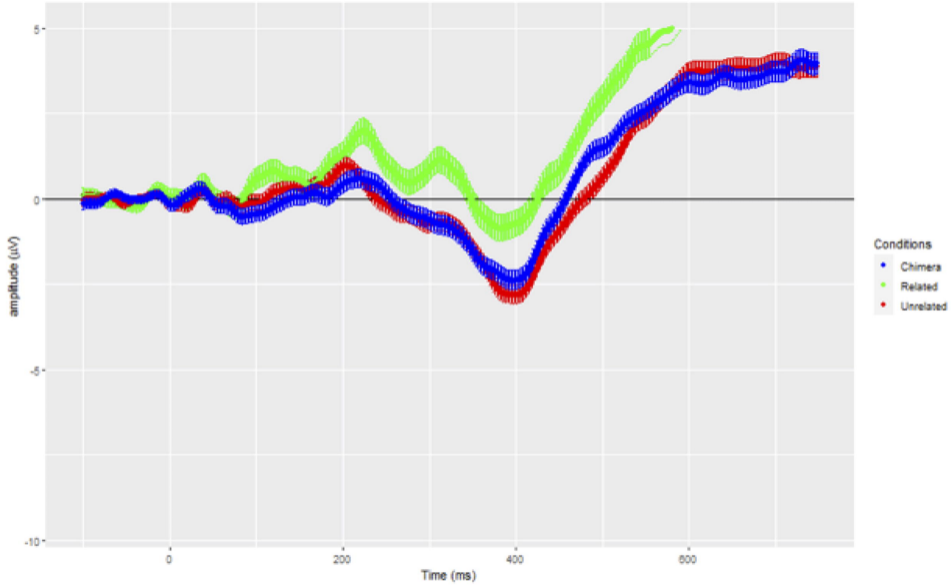



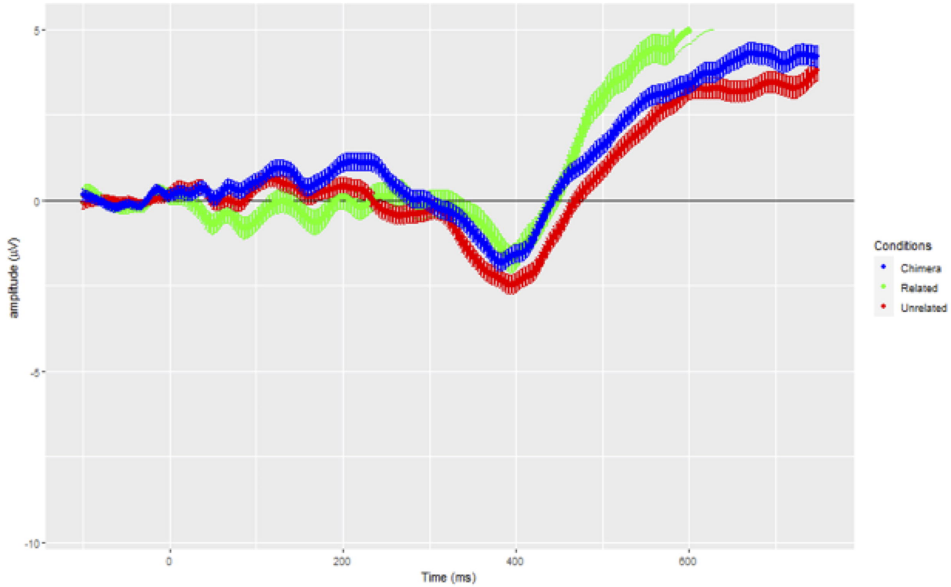

Source: https://www.biorxiv.org/content/10.1101/2023.08.30.553693v1.full.pdf
